# Supplementary material
Source: PubMed Central journal article supplement (PMC3100948)
Supplement: 1015313108_pnas.201015313SI.pdf [file 1015313108_pnas.201015313SI.pdf]

# Supporting Information

Pinsky et al. 10.1073/pnas.1015313108

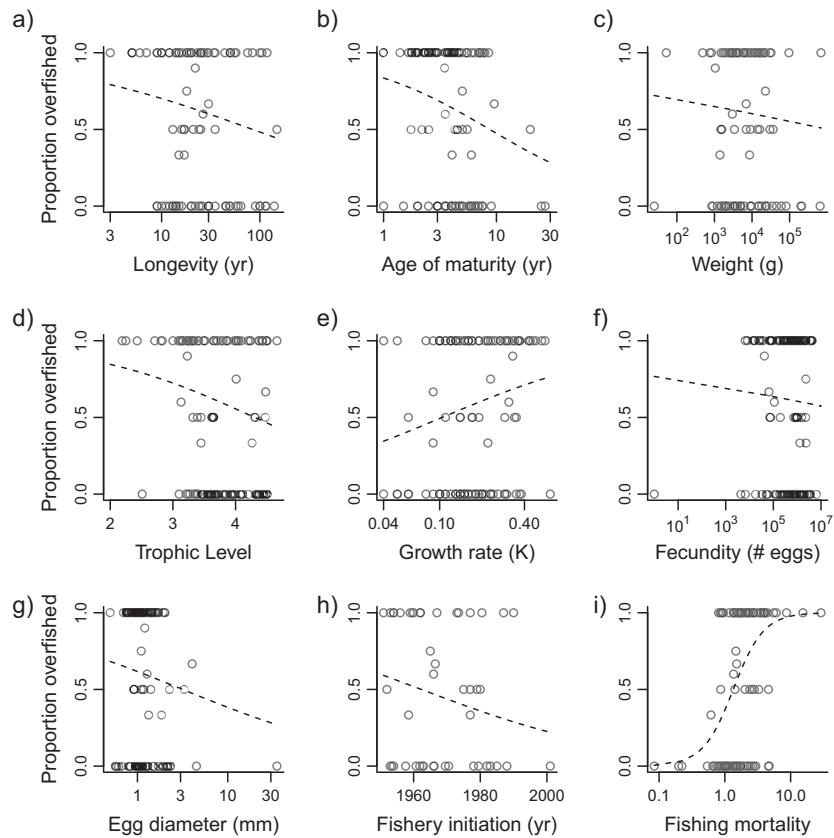

**Fig. S1.** Life-history trends in the proportion of overfished stocks ( $B_{MIN}/B_{MSY} < 50\%$ ) from the assessment data. Compare with Fig. 2. Life history characteristics include (A) lifespan ( $P = 0.064$ ,  $n = 97$ ), (B) age of maturity ( $P = 0.0095$ ,  $n = 96$ ), (C) maximum weight ( $P = 0.27$ ,  $n = 93$ ), (D) trophic level ( $P = 0.0042$ ,  $n = 120$ ), (E) growth rate ( $P = 0.010$ ,  $n = 120$ ), (F) fecundity ( $P = 0.47$ ,  $n = 93$ ), (G) investment in offspring (egg diameter,  $P = 0.22$ ,  $n = 97$ ), (H) year of fishery initiation ( $P = 0.084$ ,  $n = 46$ ), and (I) relative fishing mortality ( $P = 4 \times 10^{-7}$ ,  $n = 99$ ). All x axes are log-transformed except those for trophic level and fishery initiation. Each dot represents one species. Dashed line is the best fit from a generalized linear model.



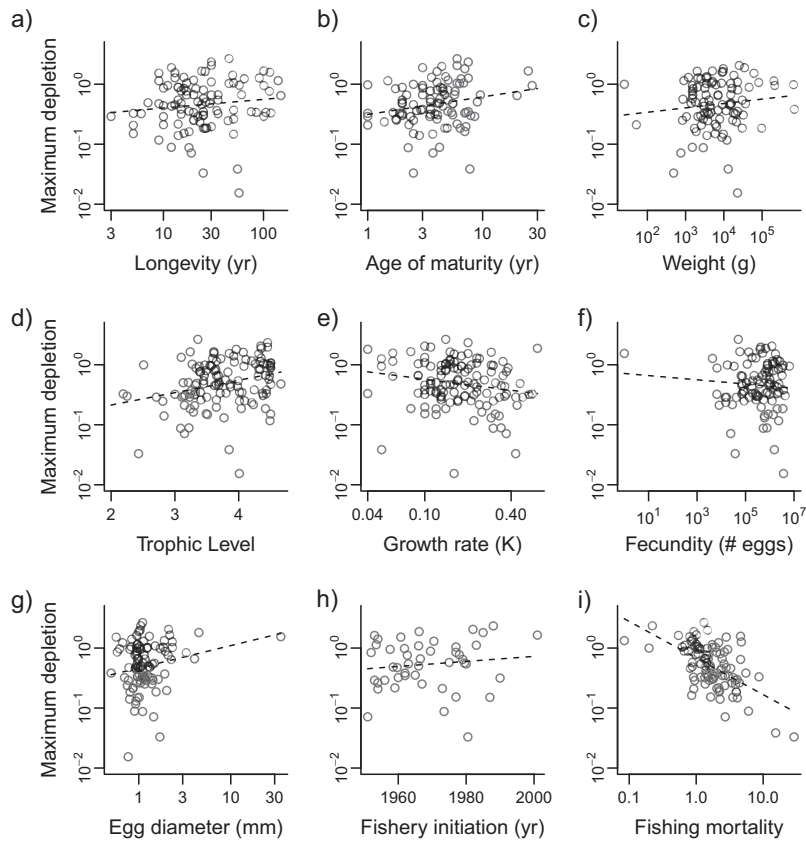

**Fig. S3.** Life history trends in the magnitude of decline ( $B_{MIN}/B_{MSY}$ ). Small values represent a species that reached low abundance. Life history characteristics include (A) lifespan ( $P = 0.22$ ,  $n = 97$ ), (B) age of maturity ( $P = 0.035$ ,  $n = 96$ ), (C) maximum weight ( $P = 0.24$ ,  $n = 93$ ), (D) trophic level ( $P = 0.0016$ ,  $n = 120$ ), (E) growth rate ( $P = 0.034$ ,  $n = 120$ ), (F) fecundity ( $P = 0.44$ ,  $n = 93$ ), (G) investment in offspring (egg diameter,  $P = 0.04$ ,  $n = 97$ ), (H) year of fishery initiation ( $P = 0.41$ ,  $n = 46$ ), and (I) relative fishing mortality ( $P = 5 \times 10^{-10}$ ,  $n = 99$ ). Compare with Fig. 2. Each dot represents one species; y axes are log-transformed.

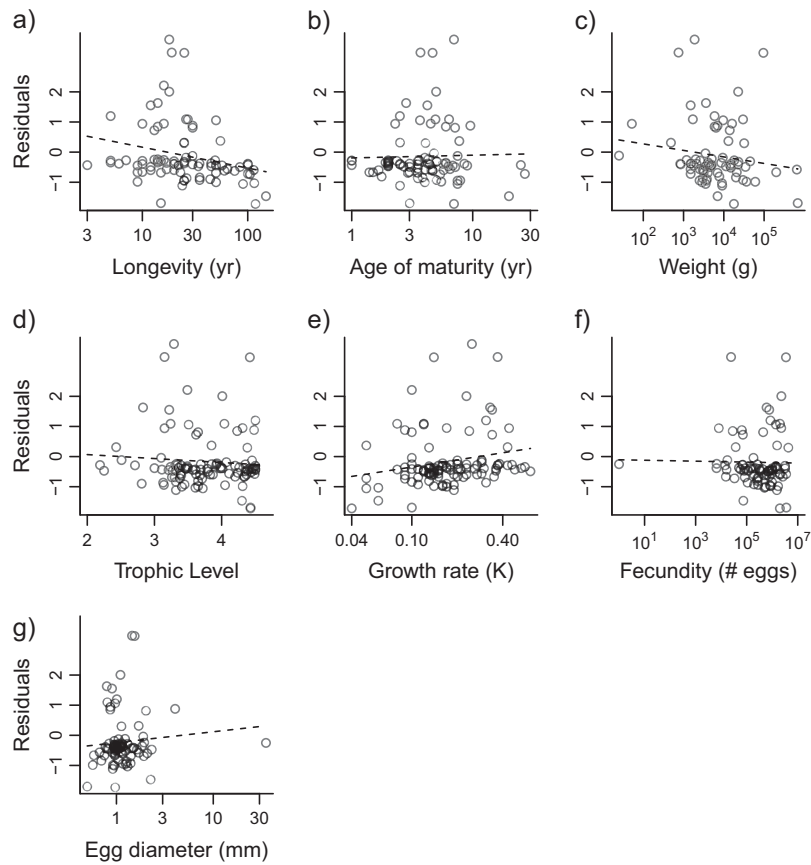

**Fig. S4.** Correcting for relative fishing mortality has little impact on the sign of the relationship between collapse probability and life history traits (assessment data). Life-history characteristics include (A) lifespan ( $P = 0.025$ ,  $n = 83$ ), (B) age of maturity ( $P = 0.82$ ,  $n = 82$ ), (C) maximum weight ( $P = 0.21$ ,  $n = 75$ ), (D) trophic level ( $P = 0.45$ ,  $n = 99$ ), (E) growth rate ( $P = 0.039$ ,  $n = 99$ ), (F) fecundity ( $P = 0.89$ ,  $n = 77$ ), and (G) investment in offspring (egg diameter,  $P = 0.43$ ,  $n = 78$ ). The y axes represent the residuals from a generalized linear model that predicted the proportion of stocks collapsed from relative fishing mortality. Positive values on the y axes represent species that are more collapsed than expected from fishery characteristics.

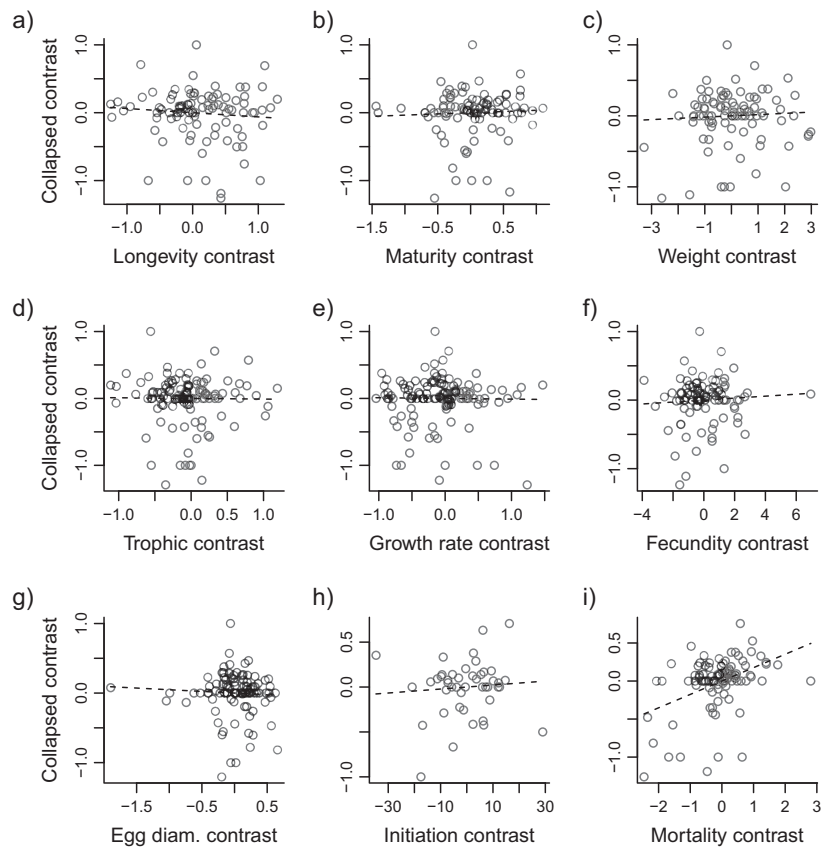

**Fig. 55.** Correcting for phylogeny with the assessment data also suggests that incidence of collapse does not increase with life-history traits, but does increase when overfishing occurs. The y axes are phylogenetically independent contrasts on the proportion of stocks collapsed. The x axes are contrasts on life-history traits, including (A) lifespan ( $P = 0.37$ ,  $n = 96$ ), (B) age of maturity ( $P = 0.64$ ,  $n = 95$ ), (C) maximum weight ( $P = 0.60$ ,  $n = 92$ ), (D) trophic level ( $P = 0.90$ ,  $n = 119$ ), (E) growth rate ( $P = 0.88$ ,  $n = 119$ ), (F) fecundity ( $P = 0.55$ ,  $n = 92$ ), (G) investment in offspring (egg diameter,  $P = 0.60$ ,  $n = 96$ ), (H) year of fishery initiation ( $P = 0.59$ ,  $n = 45$ ), and (I) relative fishing mortality ( $P = 1.2 \times 10^{-5}$ ,  $n = 98$ ). The dashed line is the best fit from a linear regression through the origin.

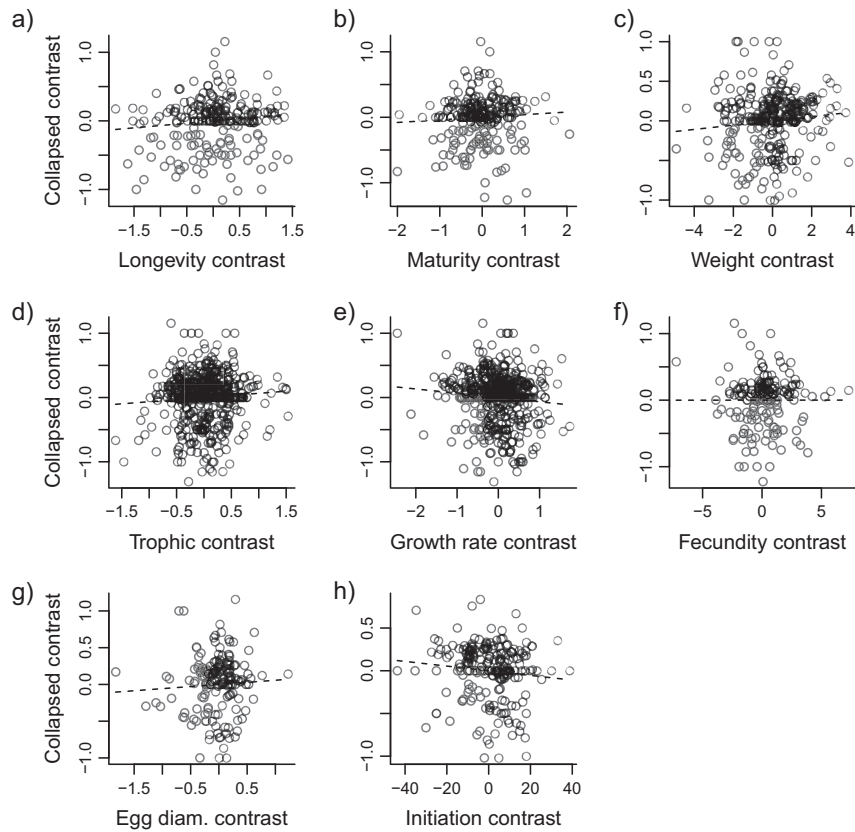

**Fig. S6.** Correcting for phylogeny with the landings data also suggests that incidence of collapse does not increase with life history traits. The y axes are phylogenetically independent contrasts on the proportion of stocks collapsed. The x axes are contrasts on life-history traits, including (A) lifespan ( $P = 0.098$ ,  $n = 205$ ), (B) age of maturity ( $P = 0.36$ ,  $n = 215$ ), (C) maximum weight ( $P = 0.099$ ,  $n = 266$ ), (D) trophic level ( $P = 0.12$ ,  $n = 456$ ), (E) growth rate ( $P = 0.041$ ,  $n = 446$ ), (F) fecundity ( $P = 1.0$ ,  $n = 171$ ), (G) investment in offspring (egg diameter,  $P = 0.50$ ,  $n = 154$ ), and (H) year of fishery initiation ( $P = 0.13$ ,  $n = 207$ ). The dashed line is the best fit from a linear regression through the origin.

## Other Supporting Information Files

[Table S1 \(DOC\)](#)

[Table S2 \(DOC\)](#)

[Table S3 \(DOC\)](#)
